# Supplementary material for: Detection of biomarkers for Hepatocellular Carcinoma using a hybrid univariate gene selection methods
Source: Springer Nature journal article supplement (doi:10.1186/1742-4682-9-34), 2012-08-06

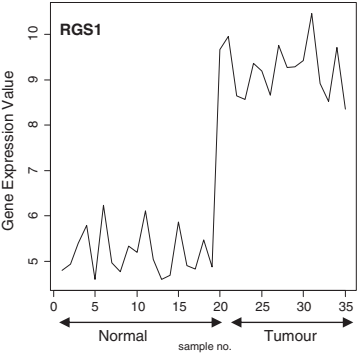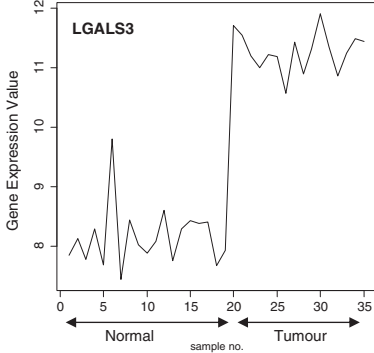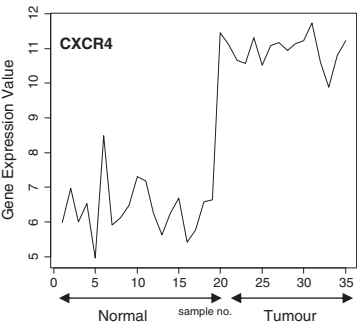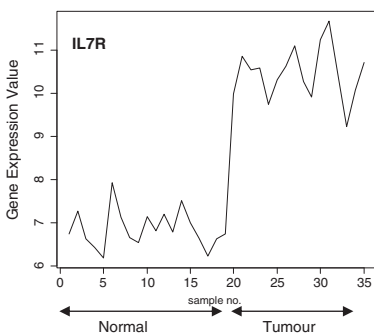

Supplement: 12976_2012_374_MOESM3_ESM.pdf [file 12976_2012_374_MOESM3_ESM.pdf]
